# Supplementary material
Source: PubMed Central journal article supplement (PMC3348458)
Supplement: NIHMS369319-supplement-1_si_001.pdf [file NIHMS369319-supplement-1_si_001.pdf]

SUPPORTING INFORMATION

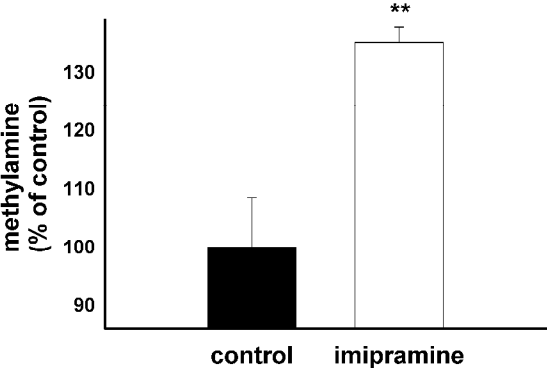

**Supplemental Figure 1.** Methylamine accumulation in MDA-1986 cells following a 24 h treatment with vehicle alone or 10  $\mu$ M imipramine. Cellular accumulation of [ $^{14}$ C]methylamine as a percentage of vehicle-treated control cells is plotted as the mean  $\pm$  S.D from three independent experimental evaluations (\*\*,  $p < .01$  by Student's t test).

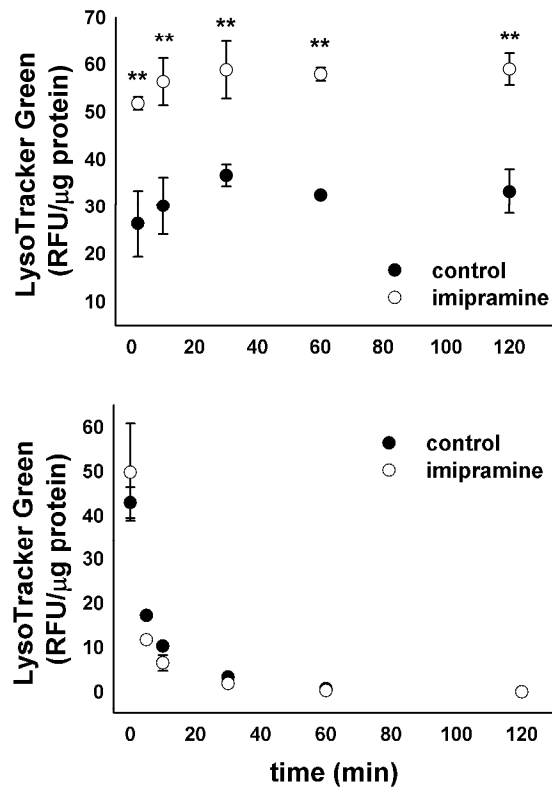

**Supplemental Figure 2.** LTG (A) uptake and (B) normalized release profile in MDA-1986 cells following a 48 h treatment with vehicle alone or 10  $\mu$ M imipramine. Cellular LTG levels were measured in fluorescence units (RFU) and normalized to cellular protein and is represented as mean  $\pm$  S.D from three independent experimental evaluations (\*\*,  $p < 0.01$  by Student's t test).

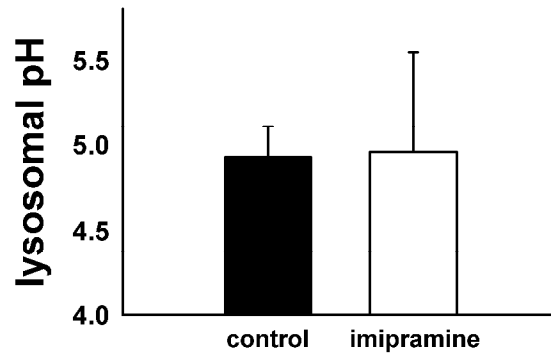

**Supplemental Figure 3.** Lysosomal pH in MDA-1986 cells following a 24 h treatment with vehicle alone or 10  $\mu$ M imipramine. Lysosomal pH was evaluated by ratiometric measurements using a pH sensitive fluorescent probe targeted to lysosomes and is represented as mean  $\pm$  S.D from at least three independent experimental evaluations.

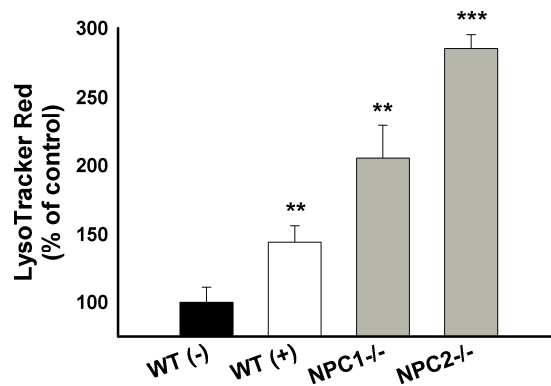

**Supplemental Figure 4.** LTR accumulation in wild type (WT) human fibroblasts following a 24 h treatment with vehicle alone (WT (-)) or 10  $\mu$ M imipramine (WT (+)), as well as, human fibroblasts from NPD patients with loss-of-function mutations in NPC1 (NPC1<sup>-/-</sup>) or (NPC2<sup>-/-</sup>). Cellular accumulation of LTR was normalized to the vehicle-treated WT cells and expressed as a percentage of control and is represented as mean  $\pm$  S.D from three independent experimental evaluations (\*\*,  $p < 0.01$ ; \*\*\*,  $p < 0.001$  by Student's t test).

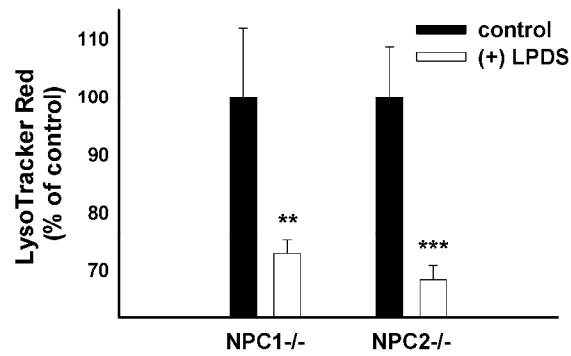

**Supplemental Figure 5.** LTR accumulation in NPC disease fibroblasts with loss-of-function mutations in NPC1 (NPC1<sup>-/-</sup>) or NPC2 (NPC2<sup>-/-</sup>) that were grown under normal conditions (black bars) or with lipoprotein-depleted media (white bars). Cellular accumulation of LTR as a percentage of the amount accumulated under normal growth conditions for each cell line was determined and is represented as mean  $\pm$  S.D from three independent experimental evaluations (\*\*,  $p < .01$ ; \*\*\*,  $p < .001$  by Student's t test).

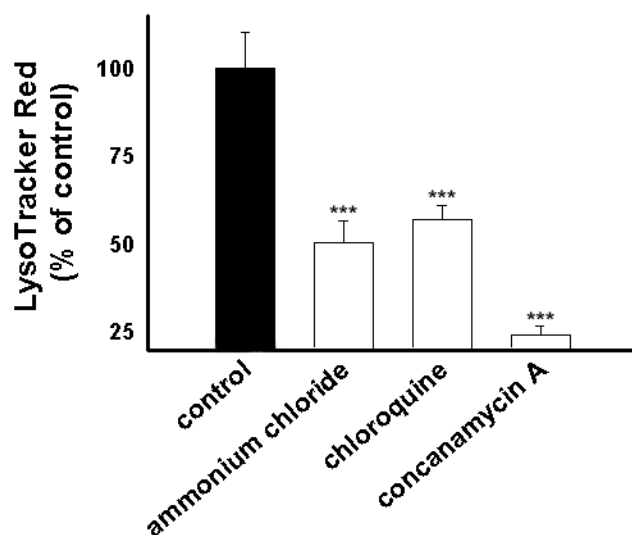

**Supplemental Figure 6.** LTR accumulation in MDA-1986 cells following a 2 h treatment with vehicle alone, 10 mM ammonium chloride, 30  $\mu$ M chloroquine or 200nM concanamycin A. Cellular accumulation of LTR as a percentage of the vehicle-treated control cells is represented as mean  $\pm$  S.D from at least three independent experimental evaluations (\*\*\*,  $p < .001$  by Student's t test).

This material is available free of charge via the Internet at <http://pubs.acs.org>.
